# Supplementary material
Source: MDPI journal article supplement (https://www.mdpi.com/2073-4352/11/5/471)
Supplement: s1 [file s1]

*Supplementary Materials*

# Virtual Screening and Molecular Docking Studies for Discovery of Potential RNA-Dependent RNA Polymerase Inhibitors

Mohammed Y. Ghazwani, Ahmed H. Bakheit, Abdulrahim R. Hakami, Hamad M. Alkahtani and Abdulrahman A. Almehezia

**Table S1.** Molecular docking interaction between RdRp and selected compounds.

| Compound         | Binding Affinity (kcal/mol) | Docking Score | Ligand | Receptor        | Interaction | Distance |
|------------------|-----------------------------|---------------|--------|-----------------|-------------|----------|
| ZINC000014944915 | −20.37                      | −5.93         | O 27   | OD1 ASP 760 (A) | H-donor     | 2.05     |
|                  |                             |               | C–H 30 | O5 POP 1003 (A) | H-donor     | 2.38     |
|                  |                             |               | O–H 38 | O5 POP 1003 (A) | H-donor     | 1.91     |
|                  |                             |               | O 27   | ND2 ASN 691 (A) | H-acceptor  | 2.28     |
|                  |                             |               | O 37   | Mg Mg 1005 (A)  | metal       | 2.49     |
|                  |                             |               | C 48   | 6-ring U 20 (P) | H-pi        | 4.03     |
|                  |                             |               | O 27   | OD1 ASP 760 (A) | H-donor     | 2.8      |
| ZINC000027556215 | −20.19                      | −5.59         | O 59   | OD2 ASP 760 (A) | H-donor     | 1.9      |
|                  |                             |               | O 44   | NE ARG 555 (A)  | H-acceptor  | 1.97     |
|                  |                             |               | O 44   | NH2 ARG 555 (A) | H-acceptor  | 2.5      |
| ZINC000013556344 | −17.91                      | −6.95         | C 3    | OD1 ASP 760 (A) | H-donor     | 3.29     |
|                  |                             |               | C 3    | O5 POP 1003 (A) | H-donor     | 3.21     |
|                  |                             |               | O 14   | O2 POP 1003 (A) | H-donor     | 2.13     |
|                  |                             |               | O 51   | O6 POP 1003 (A) | H-donor     | 1.87     |
|                  |                             |               | O 1    | NH2 ARG 555 (A) | H-acceptor  | 2.46     |
| ZINC000003833965 | −17.02                      | −5.079        | C 28   | O5 POP 1003 (A) | H-donor     | 3.34     |
|                  |                             |               | O 36   | OD2 ASP 760 (A) | H-donor     | 2.75     |
|                  |                             |               | 6-ring | CB SER 682 (A)  | pi-H        | 3.89     |
| ZINC000001642252 | −16.86                      | −5.104        | C 3    | OD2 ASP 760 (A) | H-donor     | 3.46     |
|                  |                             |               | C 3    | O5 POP 1003 (A) | H-donor     | 3.1      |
|                  |                             |               | O 20   | O3' U 20 (P)    | H-donor     | 2.01     |
|                  |                             |               | O 1    | OG SER 759 (A)  | H-acceptor  | 2.36     |
|                  |                             |               | O 1    | O2' U 20 (P)    | H-acceptor  | 1.83     |
|                  |                             |               | 6-ring | CB SER 682 (A)  | pi-H        | 3.82     |
| ZINC000028525778 | −16.78                      | −6.41         | O 3    | OD1 ASP 760 (A) | H-donor     | 3.22     |
|                  |                             |               | C 5    | OD2 ASP 760 (A) | H-donor     | 3.51     |
|                  |                             |               | O 27   | OG1 THR 556 (A) | H-donor     | 2.92     |

|                  |        |        |      |                 |            |      |
|------------------|--------|--------|------|-----------------|------------|------|
|                  |        |        | O 1  | MG Mg 1005 (A)  | metal      | 2.42 |
| ZINC000027557701 | −16.63 | −5.979 | C 37 | OD1 ASP 760 (A) | H-donor    | 3.23 |
|                  |        |        | C 37 | O5 POP 1003 (A) | H-donor    | 3.22 |
|                  |        |        | O 51 | O HOH 1104 (A)  | H-donor    | 2.68 |
|                  |        |        | O 1  | N3 U 10 (T)     | H-acceptor | 3.11 |
|                  |        |        | O 36 | NH2 ARG 555 (A) | H-acceptor | 3.1  |
|                  |        |        | C 37 | OD1 ASP 760 (A) | H-donor    | 3.23 |
| ZINC000003589958 | −16.29 | −6.07  | O 17 | OD2 ASP 760 (A) | H-donor    | 2.06 |
|                  |        |        | O 41 | SD MET 542 (A)  | H-donor    | 2.82 |
|                  |        |        | O 30 | ND2 ASN 691 (A) | H-acceptor | 2.17 |
| ZINC000001651128 | −16.27 | −6.749 | C 3  | OD2 ASP 760 (A) | H-donor    | 3.29 |
|                  |        |        | C 3  | O5 POP 1003 (A) | H-donor    | 3.1  |
|                  |        |        | O 17 | O HOH 1104 (A)  | H-donor    | 2.87 |
|                  |        |        | O 36 | O4 U 20 (P)     | H-donor    | 3.2  |
|                  |        |        | O 1  | OG SER 759 (A)  | H-acceptor | 3.02 |
|                  |        |        | O 1  | O2' U 20 (P)    | H-acceptor | 2.67 |
|                  |        |        | O 25 | ND2 ASN 691 (A) | H-acceptor | 2.89 |
| ZINC000013781295 | −15.41 | −3.574 | C 3  | OD1 ASP 760 (A) | H-donor    | 3.12 |
|                  |        |        | O 13 | O2 POP 1003 (A) | H-donor    | 2.85 |
|                  |        |        | C 18 | OD2 ASP 760 (A) | H-donor    | 3.48 |
|                  |        |        | O 36 | O4 U 10 (T)     | H-donor    | 2.68 |
|                  |        |        | O 1  | ND2 ASN 691 (A) | H-acceptor | 2.18 |
|                  |        |        | O 1  | OG SER 759 (A)  | H-acceptor | 1.82 |
|                  |        |        | S 23 | NH2 ARG 555 (A) | H-acceptor | 2.30 |
| ZINC000013473324 | −13.41 | −5.812 | C 36 | OD2 ASP 760 (A) | H-donor    | 2.36 |
|                  |        |        | O 10 | OG1 THR 680 (A) | H-acceptor | 2.28 |
|                  |        |        | C 36 | O5 POP 1003 (A) | H-donor    | 2.18 |
|                  |        |        | O 35 | OG SER 759 (A)  | H-acceptor | 2.33 |
|                  |        |        | O 35 | O2' U 20 (P)    | H-acceptor | 1.85 |

**Table S2.** The average of gyration scores and RMSD as well as the number of H-bond for selected compounds.

| Compounds        | The Average of Gyration Score | The Average Hydrogen Bonding Interaction | Number of H-bond | The Average of RMSD |
|------------------|-------------------------------|------------------------------------------|------------------|---------------------|
| ZINC000028525778 | 31.31 ± 0.086                 | 3.01                                     | 27               | 1.976 ± 0.377       |
| ZINC000001642252 | 31.4 ± 0.141                  | 0.43                                     | 17               | 2.141 ± 0.425       |
| ZINC000001651128 | 31.36 ± 0.121                 | 3.93                                     | 20               | 2.002 ± 0.297       |
| ZINC000003589958 | 31.29 ± 0.134                 | 4.81                                     | 38               | 1.854 ± 0.312       |
| ZINC000003833965 | 31.08 ± 0.066                 | 1.65                                     | 26               | 1.81 ± 0.305        |
| ZINC000013473324 | 31.3 ± 0.151                  | 3.54                                     | 32               | 1.943 ± 0.394       |
| ZINC000013556344 | 31.37 ± 0.124                 | 4.95                                     | 35               | 2.023 ± 0.369       |
| ZINC000013781295 | 31.14 ± 0.09                  | 4.37                                     | 14               | 2.022 ± 0.368       |
| ZINC000014944915 | 31.21 ± 0.111                 | 3.98                                     | 19               | 1.825 ± 0.288       |
| ZINC000027556215 | 31.3 ± 0.103                  | 2.69                                     | 22               | 1.986 ± 0.249       |

|                  |               |      |    |              |
|------------------|---------------|------|----|--------------|
| ZINC000027557701 | 91.52 ± 0.204 | 1.93 | 23 | 5.306 ± 0.89 |
| Protein Backbone | 31.17 ± 0.073 |      | -  | 1.947 ± 0.31 |

**Table S3.** Physicochemical properties of the hit compounds based on Lipinski's rule-of-five.

|                  | logP   | Molecular Weight | Num_H_Acceptors | Num_H_Donors | Molecular Fractional Polar Surface Area | Num. Ring | Num_Rotatable bonds | logD   |
|------------------|--------|------------------|-----------------|--------------|-----------------------------------------|-----------|---------------------|--------|
| ZINC000001642252 | 3.331  | 300.306          | 5               | 3            | 0.287                                   | 2         | 6                   | 3.325  |
| ZINC000001651128 | 3.103  | 340.327          | 6               | 4            | 0.339                                   | 2         | 6                   | 3.065  |
| ZINC000003589958 | 2.126  | 429.377          | 9               | 6            | 0.414                                   | 2         | 9                   | 0.636  |
| ZINC000003833965 | -0.52  | 360.447          | 5               | 3            | 0.262                                   | 2         | 8                   | -0.493 |
| ZINC000013473324 | 1.72   | 400.425          | 6               | 2            | 0.256                                   | 3         | 9                   | 1.72   |
| ZINC000013556344 | 4.193  | 440.443          | 8               | 4            | 0.311                                   | 3         | 8                   | 4.155  |
| ZINC000013781295 | 3.414  | 356.392          | 6               | 4            | 0.361                                   | 3         | 2                   | 3.376  |
| ZINC000014944915 | -2.417 | 311.377          | 5               | 4            | 0.354                                   | 1         | 6                   | -2.367 |
| ZINC000027556215 | 1.687  | 516.451          | 12              | 7            | 0.431                                   | 3         | 9                   | 0.194  |
| ZINC000027557701 | 4.193  | 440.443          | 8               | 4            | 0.311                                   | 3         | 8                   | 4.155  |
| ZINC000028525778 | 2.535  | 356.283          | 8               | 4            | 0.411                                   | 3         | 4                   | 0.367  |

**Table S4.** ADMET values of selected hit compounds.

|                  | Absorption Level | CYP2D6 | Hepatotoxicity | PPB | Solubility Level | BBB Level | AlogP98 | PSA_2D  |
|------------------|------------------|--------|----------------|-----|------------------|-----------|---------|---------|
| ZINC000001642252 | 0                | 0      | false          | 1   | 3                | 3         | 3.331   | 88.677  |
| ZINC000001651128 | 1                | 0      | false          | 1   | 3                | 4         | 3.103   | 117.863 |
| ZINC000003589958 | 3                | 0      | false          | 0   | 3                | 4         | 2.126   | 177.72  |
| ZINC000003833965 | 0                | 0      | false          | 0   | 3                | 3         | 1.959   | 103.697 |
| ZINC000013473324 | 0                | 0      | false          | 1   | 3                | 3         | 1.72    | 104.313 |
| ZINC000013556344 | 2                | 0      | false          | 1   | 2                | 4         | 4.194   | 135.723 |
| ZINC000013781295 | 0                | 0      | false          | 0   | 3                | 4         | 3.414   | 100.562 |
| ZINC000014944915 | 0                | 0      | true           | 0   | 4                | 4         | 0.062   | 124.878 |
| ZINC000027556215 | 3                | 0      | false          | 0   | 2                | 4         | 1.687   | 215.471 |
| ZINC000027557701 | 2                | 0      | false          | 1   | 2                | 4         | 4.194   | 135.723 |
| ZINC000028525778 | 1                | 0      | true           | 1   | 3                | 4         | 2.535   | 135.723 |

**AlogP98:** must be less than 5 for good absorption through BBB. **Absorption level:** 0 = good, 1 = moderate, 2 = low, 3 = very low and 4 = Undefined. **Hepatotoxicity:** False = non-toxic and True = toxic. **CYP 2D6 inhibitory effect:** 0 = non-inhibitor and 1 = inhibitor. **PPB (plasma protein binding):** 1 = binding and 0 = non-binding. **Solubility level** is the prediction of molar solubility of drugs: level 0 = Extremely low solubility; level 1 = No, very low; level 2 = Yes, low solubility; level 3 = Good solubility; level 4 = optimal solubility; level 5 = No, too soluble.

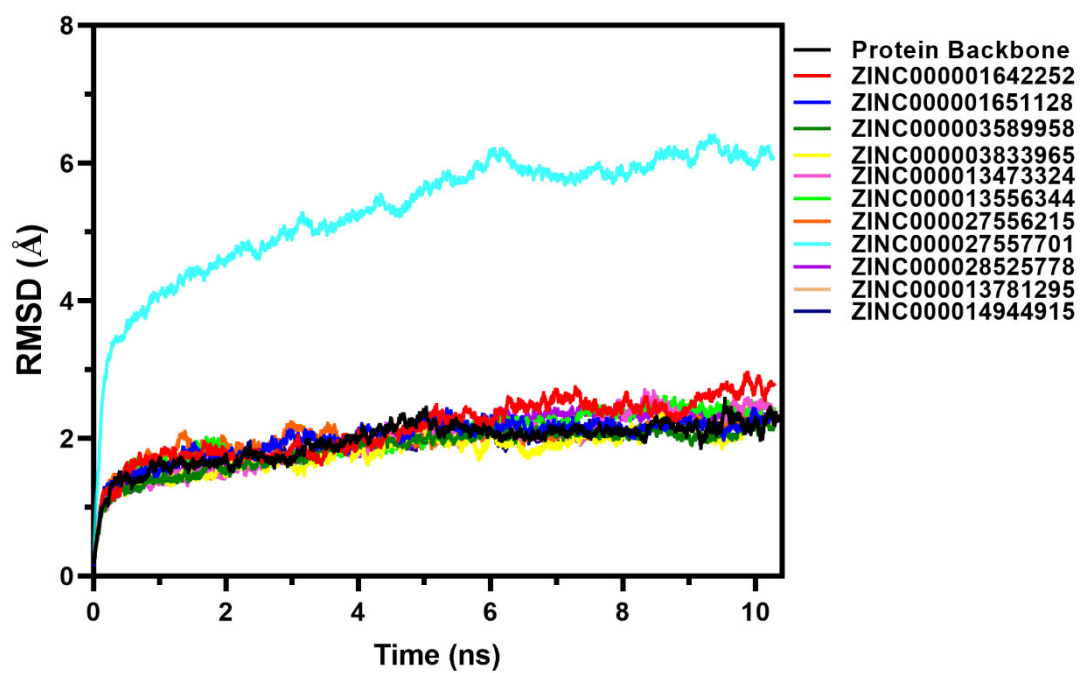

Figure S1. RMSD of the hit compounds and the protein calculated as a function of time over a 10 ns run.

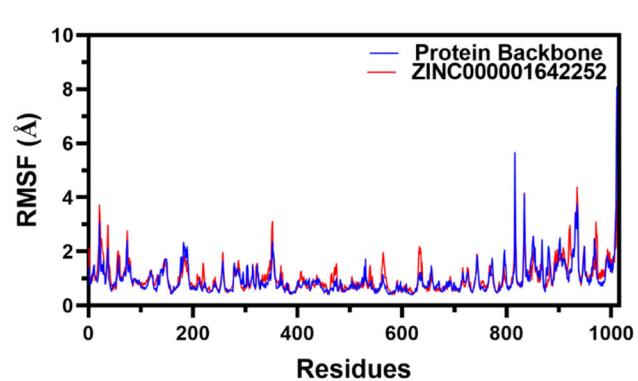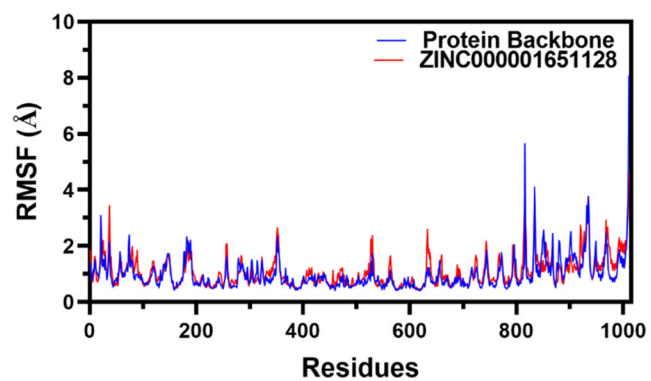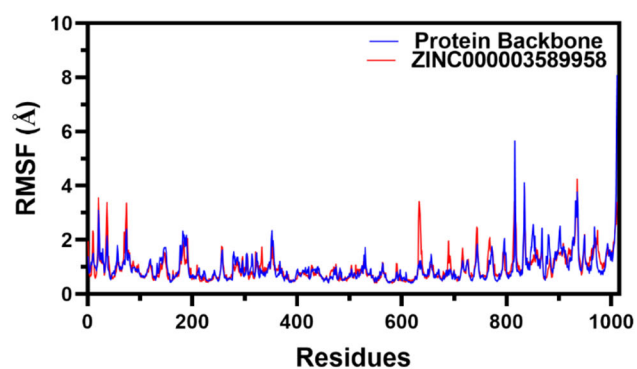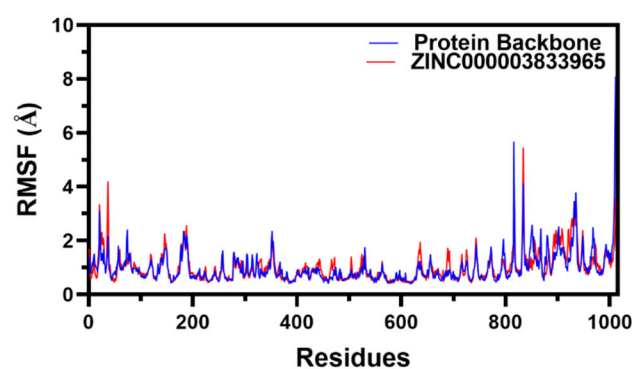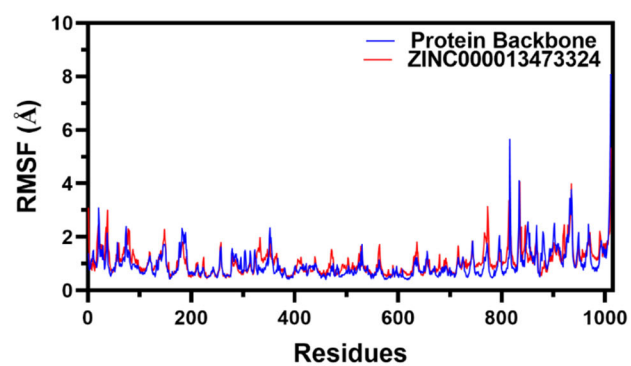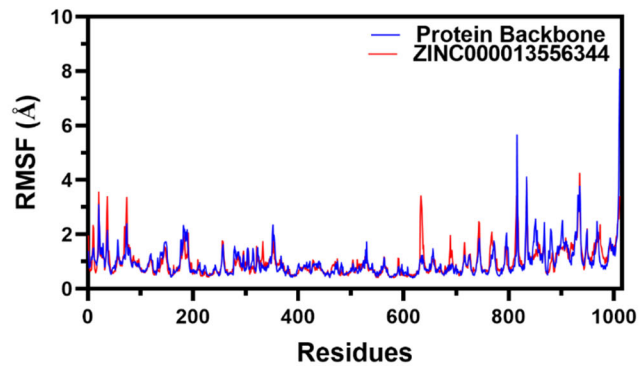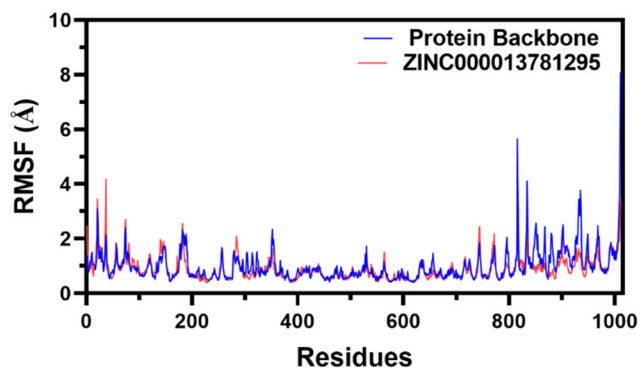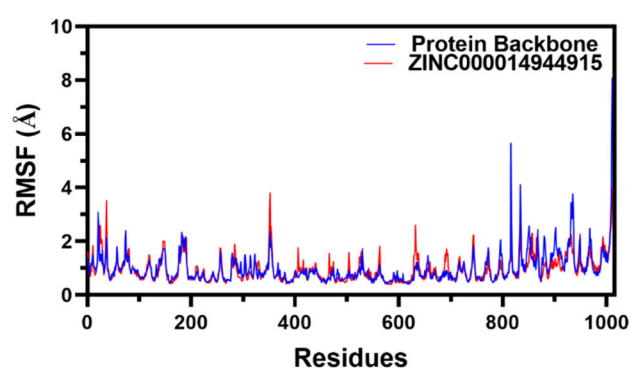

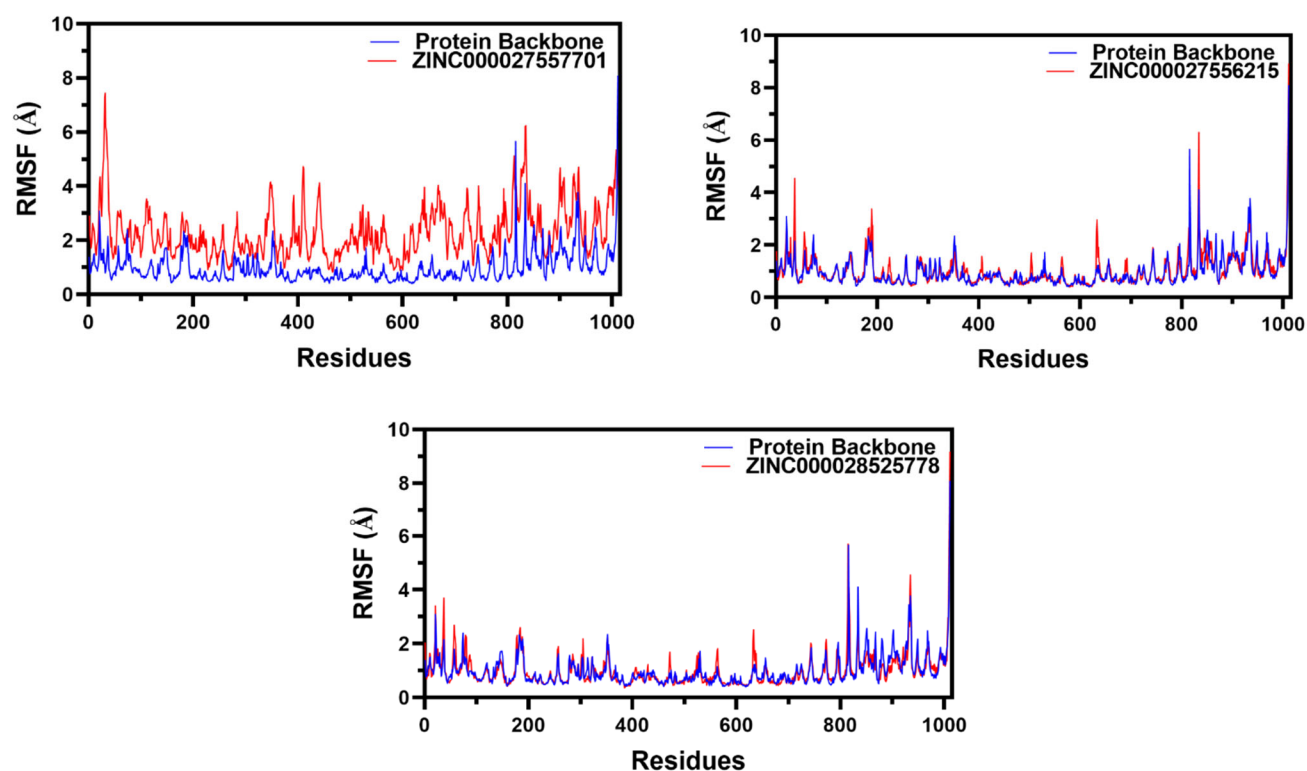

Figure S2. RMSF of the hit compounds and amino acid residues calculated as a function of time over a 10 ns run.

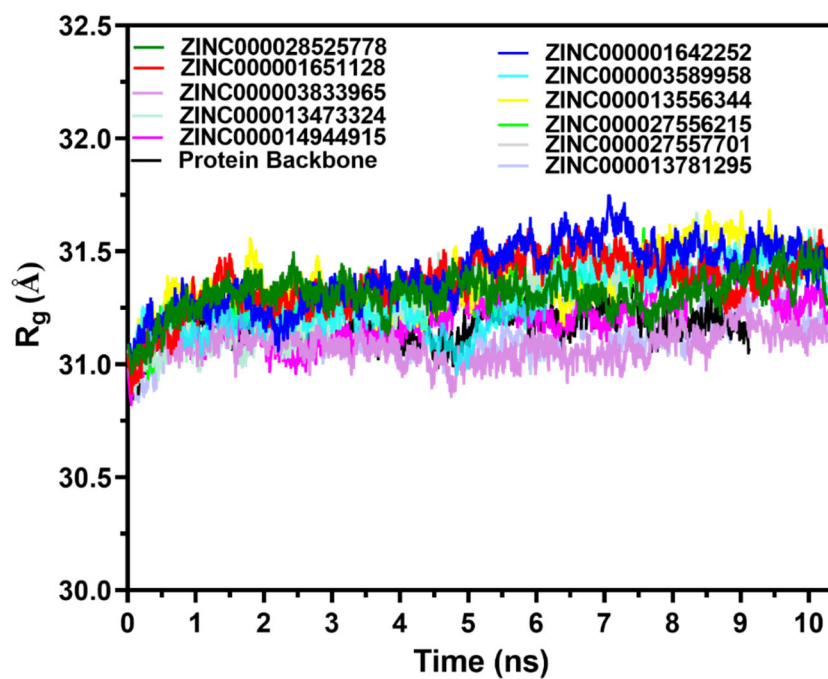

Figure S3. Radius of gyration of the protein and the 11 compounds calculated as a function of time over a 10 ns run.

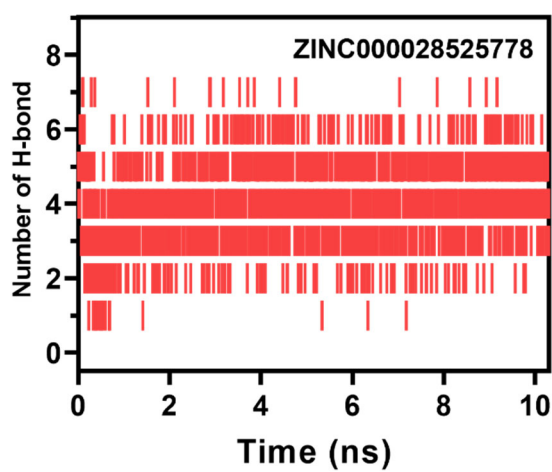

(a)

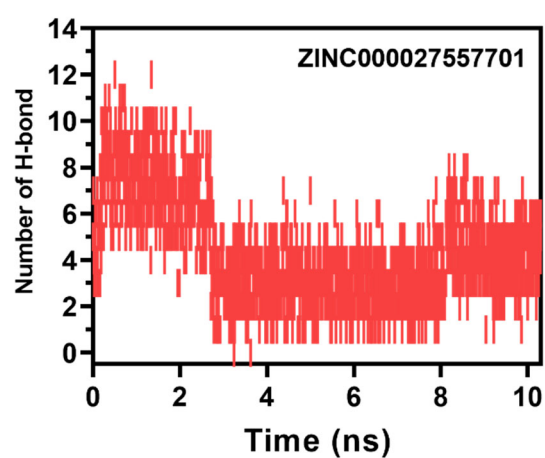

(b)

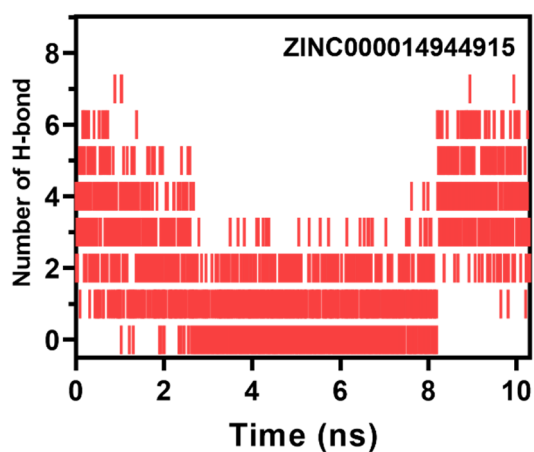

(c)

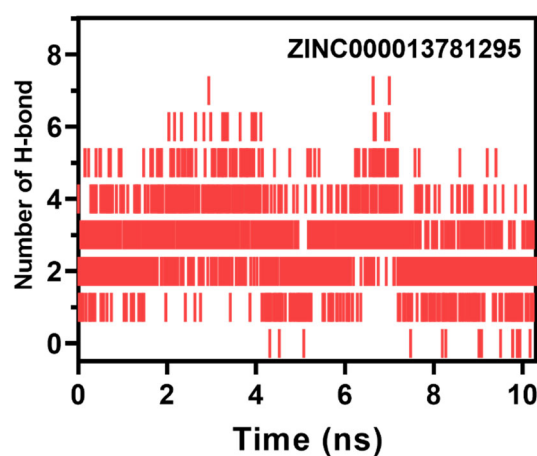

(d)

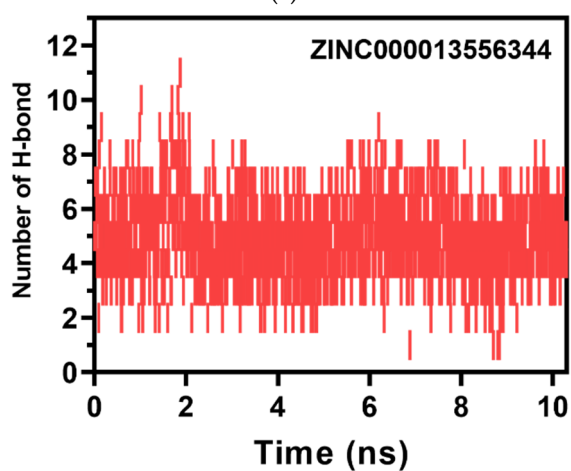

(e)

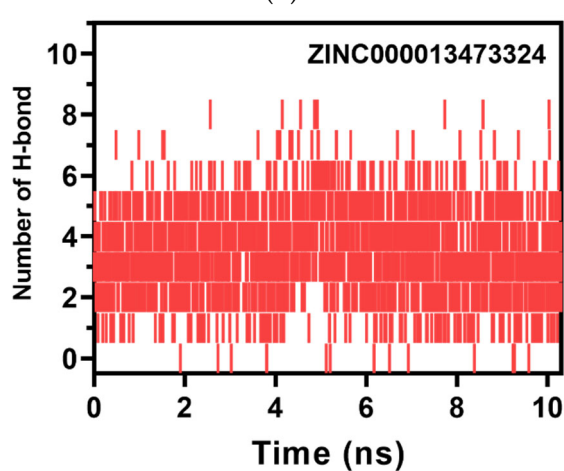

(f)

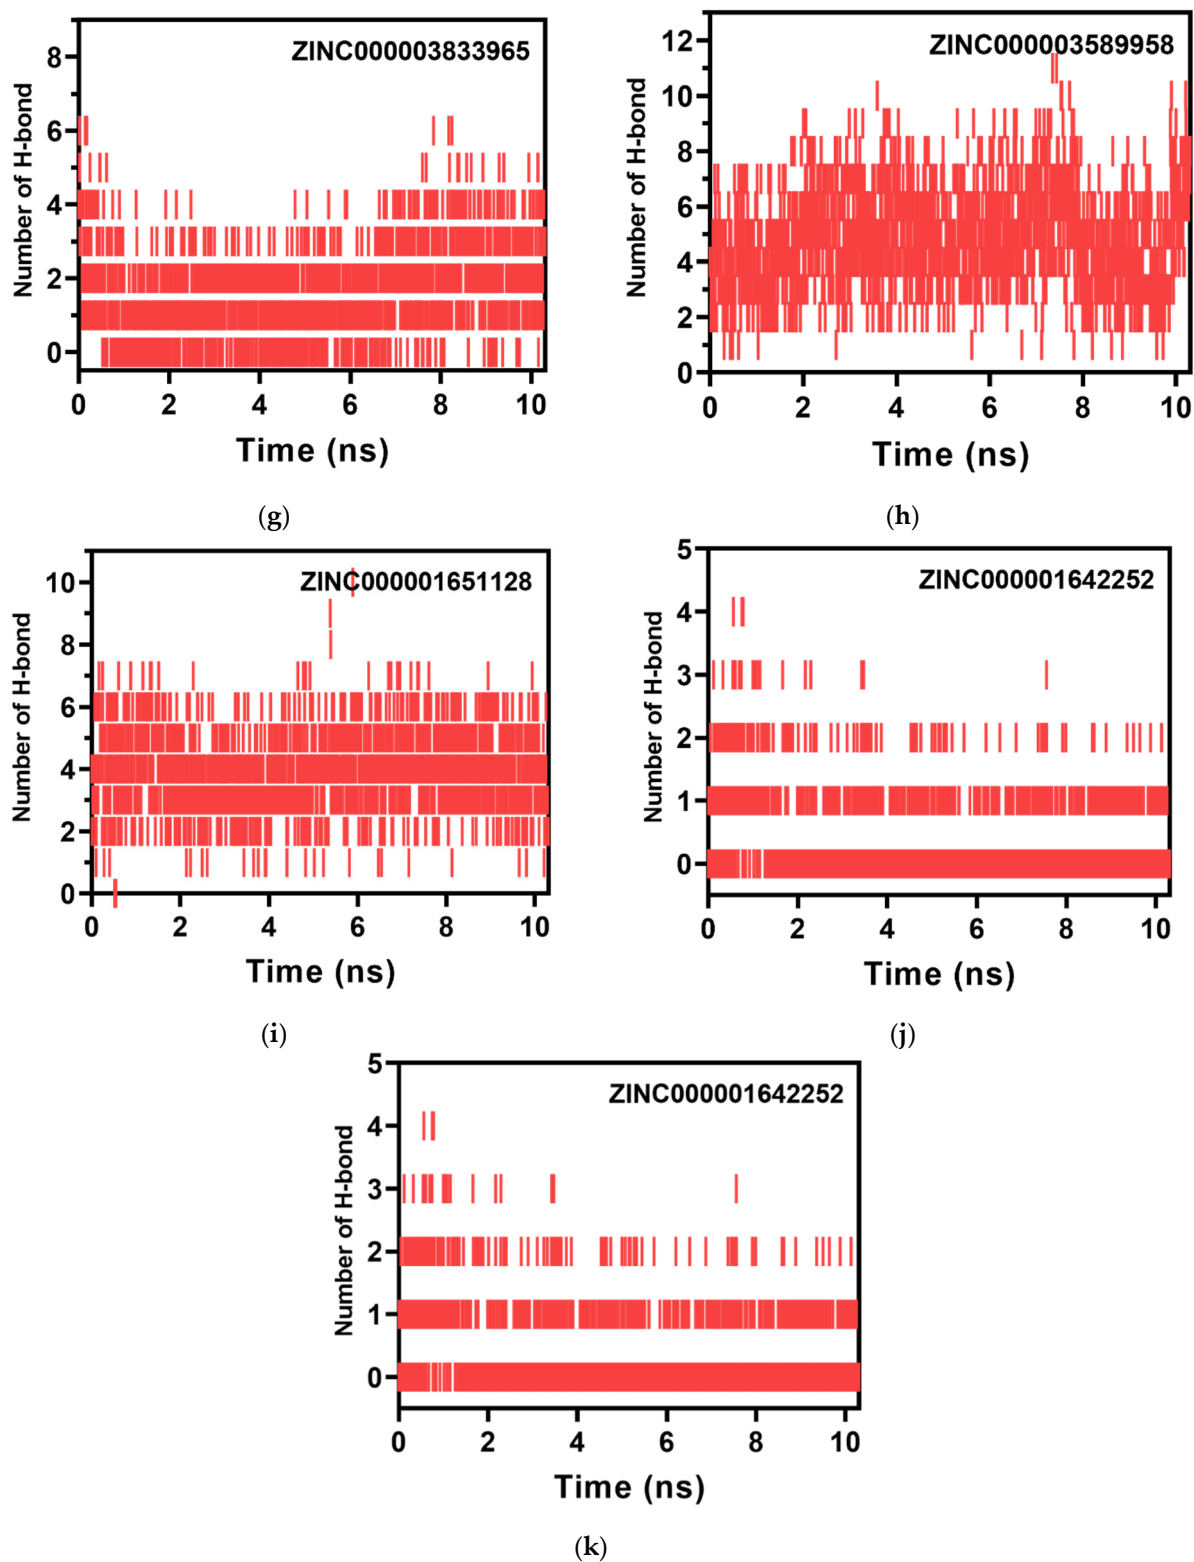

Figure S4. (a)–(k) Hydrogen bond stabilization of the 11 compounds over 10 ns production run.



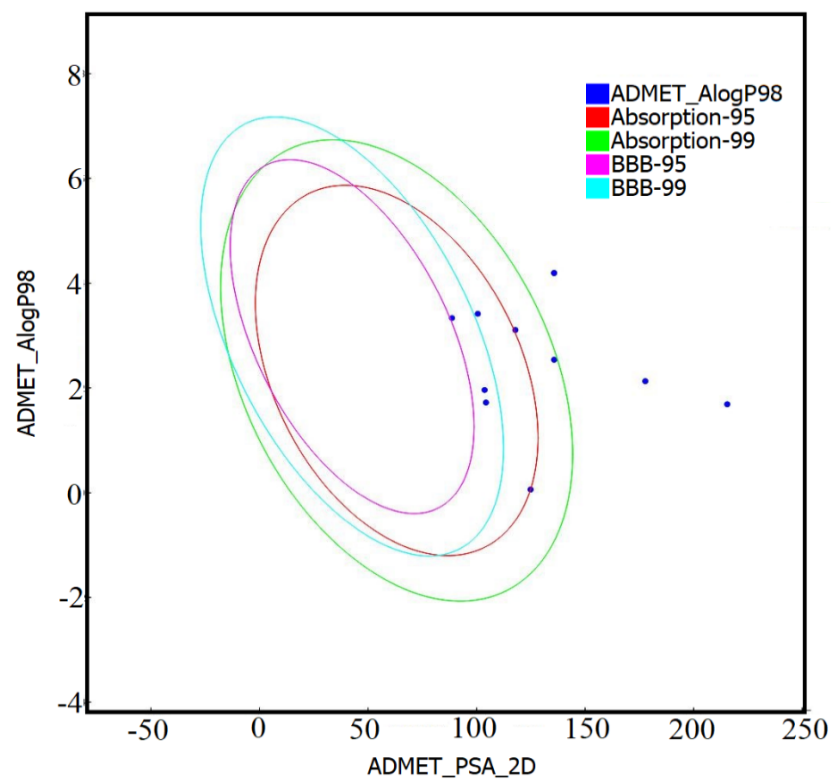

**Figure S5.** ADMET plot for the selected hits. The 95% and 99% confidence limit ellipses are shown which are corresponding BBB and HIA models.
